# Supplementary material for: Reconstructed glacier area and volume changes in the European Alps since the Little Ice Age
Source: Copernicus journal article supplement (doi:10.5194/egusphere-2024-989), 2024-05-03
Supplement: Supplementary file 1 [file egusphere-2024-989-supplement.pdf]

1 *Supplement of*  
2 **Reconstructed glacier area and volume**  
3 **changes in the European Alps since the**  
4 **Little Ice Age**

5 Johannes Reinthaler<sup>1</sup>, Frank Paul<sup>1</sup>

6 <sup>1</sup> Department of Geography, University of Zurich, Zurich, Switzerland

7

8 *Correspondence:* Johannes Reinthaler (johannes.reinthal@geo.uzh.ch)

9

10

11 **Content:**

|    |   |                               |    |
|----|---|-------------------------------|----|
| 12 | 1 | Supplementary tables .....    | 2  |
| 13 | 2 | Supplementary figures .....   | 5  |
| 14 | 3 | Uncertainty calculation ..... | 16 |
| 15 | 4 | Parameter calculations: ..... | 17 |
| 16 | 5 | Additional references .....   | 18 |

17

18

19

20 **1 Supplementary tables**

21 **Table S1: List of historical maps with glacier extents available for the different Alpine countries.**

| County      | Name                                                                                                           | Date      | Scale    | Link                                                                                                                                                                                                                                                                                                                                                                                                                                                                                                                                                        |
|-------------|----------------------------------------------------------------------------------------------------------------|-----------|----------|-------------------------------------------------------------------------------------------------------------------------------------------------------------------------------------------------------------------------------------------------------------------------------------------------------------------------------------------------------------------------------------------------------------------------------------------------------------------------------------------------------------------------------------------------------------|
| Switzerland | Dufour map                                                                                                     | 1845-1865 | 1:100000 | <a href="https://www.swisstopo.admin.ch/en/geodata/maps/historical/dufour.html">https://www.swisstopo.admin.ch/en/geodata/maps/historical/dufour.html</a>                                                                                                                                                                                                                                                                                                                                                                                                   |
|             | Siegfried map                                                                                                  | 1870-1926 | 1:50000  | <a href="https://www.swisstopo.admin.ch/en/geodata/maps/historical/siegfried25.html">https://www.swisstopo.admin.ch/en/geodata/maps/historical/siegfried25.html</a>                                                                                                                                                                                                                                                                                                                                                                                         |
| France      | Carte de l'état major                                                                                          | 1820-1866 | 1:40000  | <a href="https://www.geoportail.gouv.fr/donnees/carte-de-letat-major-1820-1866">https://www.geoportail.gouv.fr/donnees/carte-de-letat-major-1820-1866</a>                                                                                                                                                                                                                                                                                                                                                                                                   |
| Italy       | Übersichtskarte der Dolomiten                                                                                  | 1903      | 1:100000 | <a href="https://www.e-rara.ch/zut/content/titleinfo/29139322">https://www.e-rara.ch/zut/content/titleinfo/29139322</a>                                                                                                                                                                                                                                                                                                                                                                                                                                     |
|             | Austro-Hungarian Monarchy. Militärgeographisches Institut, Zone 19 col 6 (Toblach & Cortina d' Ampezzo)        | 1889      | 1:75000  | <a href="https://digitalcollections.nysl.org/items/510d47df-8b8d-a3d9-e040-e00a18064a99">https://digitalcollections.nysl.org/items/510d47df-8b8d-a3d9-e040-e00a18064a99</a>                                                                                                                                                                                                                                                                                                                                                                                 |
|             | Austro-Hungarian Monarchy. Militärgeographisches Institut, Zone 20 col 5 (Bozen & Fleimstal)                   | 1882      | 1:75000  | <a href="https://digitalcollections.nysl.org/items/510d47df-8bae-a3d9-e040-e00a18064a99">https://digitalcollections.nysl.org/items/510d47df-8bae-a3d9-e040-e00a18064a99</a>                                                                                                                                                                                                                                                                                                                                                                                 |
|             | Austro-Hungarian Monarchy. Militärgeographisches Institut, Zone 20 col 6 (Pieve Di Livinallongo und Longarone) | 1882      | 1:75000  | <a href="https://digitalcollections.nysl.org/items/510d47df-8bb0-a3d9-e040-e00a18064a99">https://digitalcollections.nysl.org/items/510d47df-8bb0-a3d9-e040-e00a18064a99</a>                                                                                                                                                                                                                                                                                                                                                                                 |
| Germany     | Topographische Karte von Bayern<br>869, Hochkarlter<br>888, Zugspitze<br>870/871, St Bartholomä                | 1889-1897 | 1:25000  | <a href="https://www.geodaten.bayern.de/histTopoKarten/01_Positionsblatt/01_869_F_1923.pdf">https://www.geodaten.bayern.de/histTopoKarten/01_Positionsblatt/01_869_F_1923.pdf</a><br><a href="https://www.geodaten.bayern.de/histTopoKarten/01_Positionsblatt/01_888_F_1936.pdf">https://www.geodaten.bayern.de/histTopoKarten/01_Positionsblatt/01_888_F_1936.pdf</a><br><a href="https://www.geodaten.bayern.de/histTopoKarten/01_Positionsblatt/01_870_F_1937.pdf">https://www.geodaten.bayern.de/histTopoKarten/01_Positionsblatt/01_870_F_1937.pdf</a> |
| Slovenia    | Studi Alpini fatti nella valle della Raccolana - Giacomo Savorgnan di Brazzà                                   | 1881      | 1:32000  | <a href="https://www.abebooks.it/STUDI-ALPINI-FATTI-VALLE-RACCOLANA-Alpi/22916664602/bd">https://www.abebooks.it/STUDI-ALPINI-FATTI-VALLE-RACCOLANA-Alpi/22916664602/bd</a>                                                                                                                                                                                                                                                                                                                                                                                 |

22

23

24 **Table S2: Existing glacier outlines used for this study and their sources.**

| Country                     | Name, Reference                                         | Date    | Nr. glaciers | Mapping approach                                                | Data Access                  |
|-----------------------------|---------------------------------------------------------|---------|--------------|-----------------------------------------------------------------|------------------------------|
| All                         | RGI 7, (Pfeffer et al., 2014; RGI 7.0 Consortium, 2023) | 2003    | 4034         | Satellite image mapping                                         | Open access                  |
|                             | (Paul et al., 2020)                                     | 2015    | 4395         | Sentinel-2                                                      | Open access                  |
| Switzerland                 | (Maisch et al., 2000)                                   | LIA     | 2380         | Digitisation of Siegfried map                                   | GLIMS                        |
|                             | (Müller et al., 1976)                                   | 1973    | 2061         | Areal photographs                                               | glamos.ch                    |
| Austria                     | (Fischer et al., 2015)                                  | LIA     | 645          | Update of existing inventory using lidar and orthophotos        | GLIMS                        |
|                             | (Groß, 1987)                                            | 1969    | 869          |                                                                 | GLIMS                        |
| France                      | (Gardent and Deline, 2011)                              | LIA     | 269          | Digitisation using maps, photographs and field investigation    | Open access dataset          |
|                             | (Vivian, 1975)                                          | 1967-71 | 502          |                                                                 | GLIMS                        |
| Italy (Aosta)               | GlaRiskAlp                                              | LIA     | 210          |                                                                 | Open access dataset          |
| Italy (Piemonte)            | (Lucchesi et al., 2014)                                 | LIA     | 96           |                                                                 | Open access dataset          |
| Italy (Trentino)            | (Zanoner et al., 2017)                                  | LIA     | 159          | Mapping using Lidar and high res. orthophotos                   | Dataset shared by the author |
| Italy (South Tyrol)         | (Knoll et al., 2009)                                    | LIA     | 300          | Digitisation using high res. DEM, orthophotos and historic maps | Dataset shared by the author |
| Italy (Friuli) and Slovenia | (Colucci and Žebre, 2016)                               | LIA     | 20           |                                                                 | Dataset shared by the author |

25

26

27 **Table S3: Previously missing glaciers and glaciers with new LIA outlines.**

| Region ID | Region name             | Nr. of previously missing glacier (rgi v7.0) | Area (rgi v7.0) km <sup>2</sup> | Glacier count (rgi v7) with new LIA outlines | Area (rgi v7.0) with new LIA outlines | Glacier count with no LIA outline | Area (rgi v7.0) with no LIA outlines |
|-----------|-------------------------|----------------------------------------------|---------------------------------|----------------------------------------------|---------------------------------------|-----------------------------------|--------------------------------------|
| 1         | Dauphiné Alps           | 294                                          | 71.19                           | 163                                          | 66.99                                 | 131                               | 4.21                                 |
| 2         | Cottian & Maritime Alps | 10                                           | 0.30                            | 1                                            | 0.06                                  | 9                                 | 0.23                                 |
| 3         | Graian Alps             | 30                                           | 1.33                            | 1                                            | 0.23                                  | 29                                | 1.10                                 |
| 4         | Savoy Prealps           | 18                                           | 3.17                            | 11                                           | 2.95                                  | 7                                 | 0.23                                 |
| 5         | Pennine Alps            | 32                                           | 13.54                           | 17                                           | 12.83                                 | 15                                | 0.70                                 |
| 6         | Bernese Alps            | 19                                           | 3.38                            | 1                                            | 2.84                                  | 18                                | 0.54                                 |
| 7         | Glarus Alps             | 4                                            | 0.14                            |                                              |                                       | 4                                 | 0.14                                 |
| 8         | Lepontine Alps          | 43                                           | 7.31                            | 19                                           | 6.70                                  | 24                                | 0.61                                 |
| 9         | Rhaetian Alps West      | 179                                          | 39.47                           | 81                                           | 36.50                                 | 98                                | 2.97                                 |
| 10        | Rhaetian Alps East      | 2                                            | 0.03                            |                                              |                                       | 2                                 | 0.03                                 |
| 11        | Rhaetian Alps South     | 74                                           | 41.05                           | 58                                           | 40.49                                 | 16                                | 0.56                                 |
| 12        | Tauern Alps West        | 18                                           | 2.32                            | 7                                            | 2.03                                  | 11                                | 0.29                                 |
| 13        | Dolomites & Carnic Alps | 33                                           | 2.33                            | 22                                           | 1.94                                  | 11                                | 0.39                                 |
| 14        | Northeastern Alps       | 11                                           | 0.91                            | 8                                            | 0.81                                  | 3                                 | 0.10                                 |
| Total     |                         | 767                                          | 186.48                          | 389                                          | 174.38                                | 378                               | 12.11                                |

28

29

30 **Table S4: Glacier area, volume and change values per country. Data for P2 are from Hugonnet et al. (2021).**

| Country     | Area LIA (km <sup>2</sup> ) | Area 2015 (km <sup>2</sup> ) | Relative area change LIA-2015 (%) | Volume LIA (km <sup>3</sup> ) | Volume 2015 (km <sup>3</sup> ) | Relative volume change (%) | Mean elevation change (P3) (m) | Increase in volume change rate (%) (P2 vs. P1) |
|-------------|-----------------------------|------------------------------|-----------------------------------|-------------------------------|--------------------------------|----------------------------|--------------------------------|------------------------------------------------|
| France      | 537.11                      | 225.63                       | -58.0                             | 33.64                         | 12.21                          | -63.7                      | -42.55                         | 65.4                                           |
| Switzerland | 1790.26                     | 889.88                       | -50.3                             | 133.51                        | 59.33                          | -55.6                      | -40.93                         | 59.5                                           |
| Italy       | 967.82                      | 318.59                       | -67.1                             | 57.65                         | 14.76                          | -74.4                      | -44.72                         | 38.9                                           |
| Austria     | 910.98                      | 358.27                       | -60.7                             | 56.00                         | 13.32                          | -76.2                      | -47.03                         | 38.3                                           |
| Germany     | 3.36                        | 0.30                         | -92.1                             | 0.13                          | 0.003                          | -97.8                      | -29.72                         | 28.5                                           |
| Slovenia    | 0.82                        |                              | -100                              | 0.02                          |                                | -100                       | -21.90                         |                                                |

31

32

33 **Table S5: Glacier area, volume and change values per basin. The basins of the Adige, Brenta, Piave, Tagliamento and**  
 34 **Soča are listed together under south-eastern Alps. Data for P2 from Hugonnet et al. (2021).**

| Basin              | Area LIA (km <sup>2</sup> ) | Area 2015 (km <sup>2</sup> ) | Relative area change LIA-2015 (%) | Volume LIA (km <sup>3</sup> ) | Volume 2015 (km <sup>3</sup> ) | Volume change rate P1 (km <sup>3</sup> a <sup>-1</sup> ) | Volume change rate P2 (km <sup>3</sup> a <sup>-1</sup> ) | Increase in volume change rate (%) (P2 vs. P1) |
|--------------------|-----------------------------|------------------------------|-----------------------------------|-------------------------------|--------------------------------|----------------------------------------------------------|----------------------------------------------------------|------------------------------------------------|
| Rhône              | 1480.97                     | 781.47                       | -47.2                             | 116.47                        | 53.48                          | -0.36                                                    | -0.78                                                    | 54.0                                           |
| south-eastern Alps | 345.32                      | 92.01                        | -73.4                             | 18.72                         | 3.11                           | -0.10                                                    | -0.08                                                    | -16.5                                          |
| Po                 | 723.99                      | 269.80                       | -62.7                             | 44.20                         | 13.06                          | -0.19                                                    | -0.23                                                    | 17.2                                           |
| Danube             | 1026.74                     | 397.32                       | -61.3                             | 61.51                         | 15.13                          | -0.27                                                    | -0.30                                                    | 9.8                                            |
| Rhine              | 631.89                      | 265.29                       | -58.0                             | 40.04                         | 14.85                          | -0.13                                                    | -0.29                                                    | 54.6                                           |

35

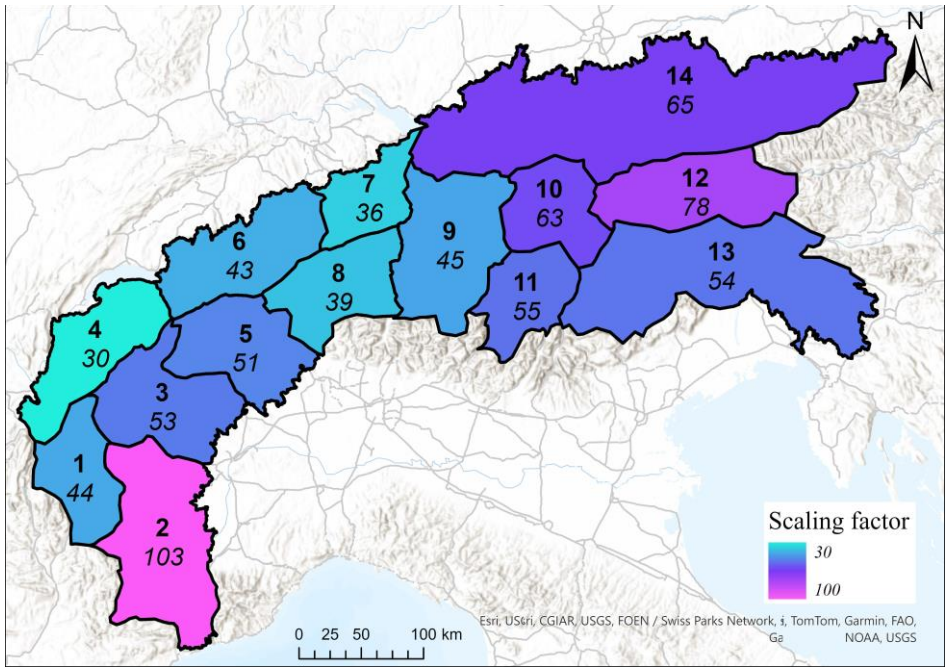

37

38 **Figure S1: Region IDs (bold) and scaling factors (italic) used for the LIA surface reconstruction.**

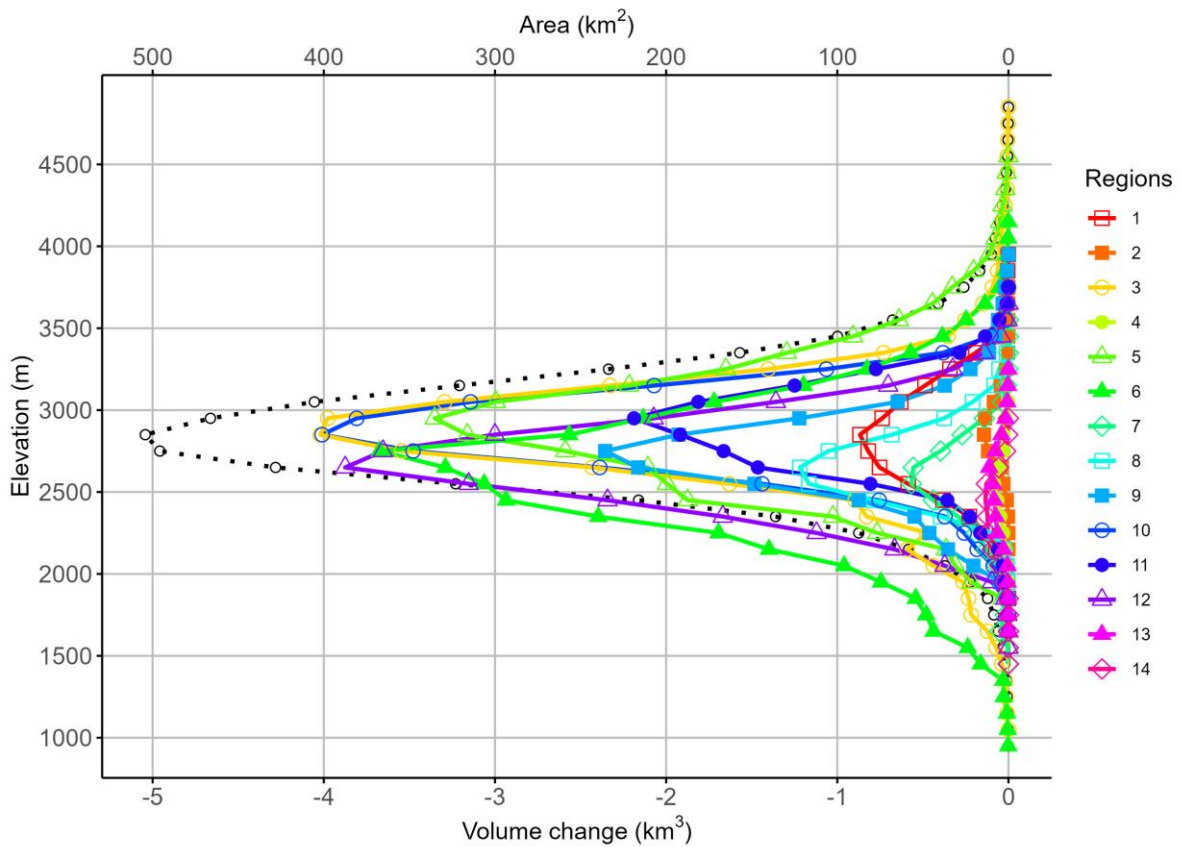

39  
40

41 **Figure S2: Volume change for the 14 subregions (the black dotted line indicates the area in the specific elevation).**

42

43

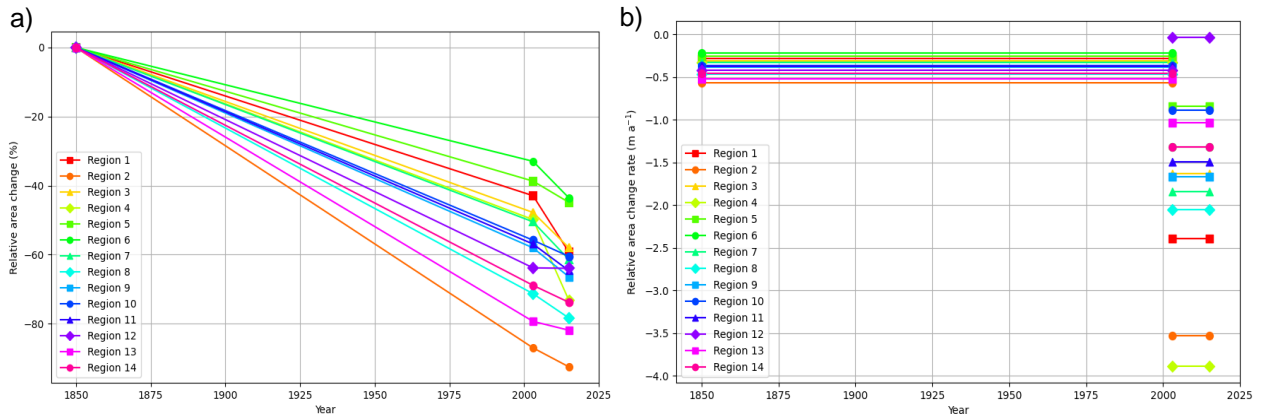

44

45 **Figure S3: a) Relative glacier area change per region. b) relative area change rate per region.**

46

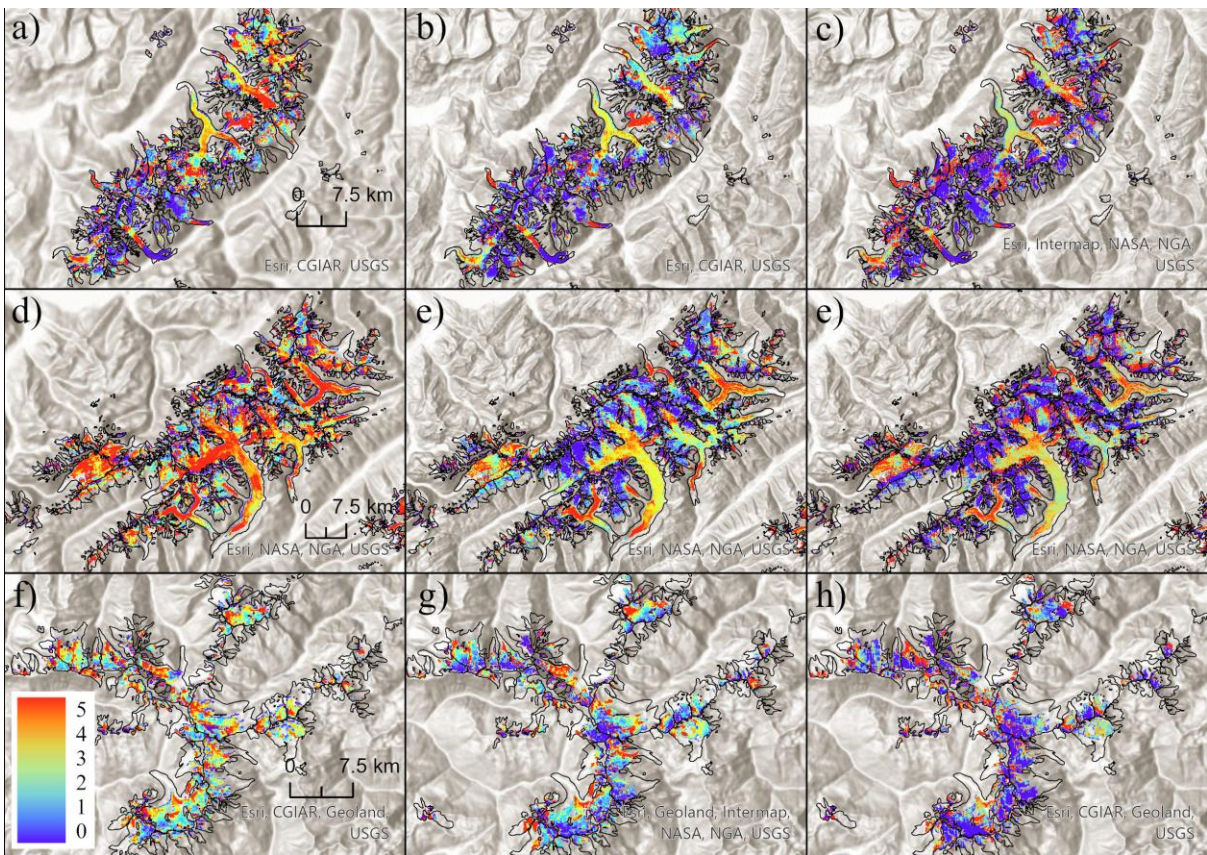

47

48 **Figure S4: Acceleration rate after 2000 calculated for a), d), f) from Hugonnet et al. (2021), b), e), g) from Sommer et**  
 49 **al. (2020) and c), e), h) from the difference of the SRTM DEM and the COP DEM. The mountain ranges are a-c) Mt.**  
 50 **Blanc, d-e) Bernese Alps, f-h) Ortles range. All background images: ESRI, (2023a).**

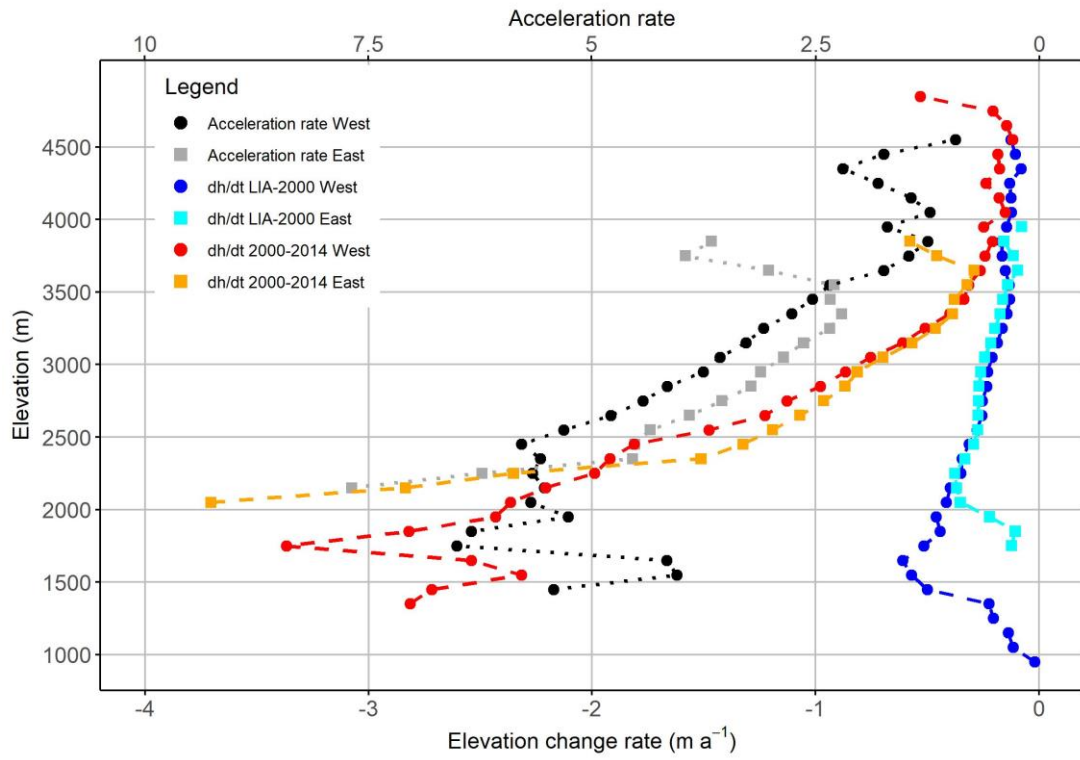

51

52 **Figure S5: Elevation change rates LIA to 2000 (P1) and 2000 to 2014 (P2) from Hugonnet et al. (2021) as well as the**  
 53 **acceleration rate for the eastern and western Alps.**

54

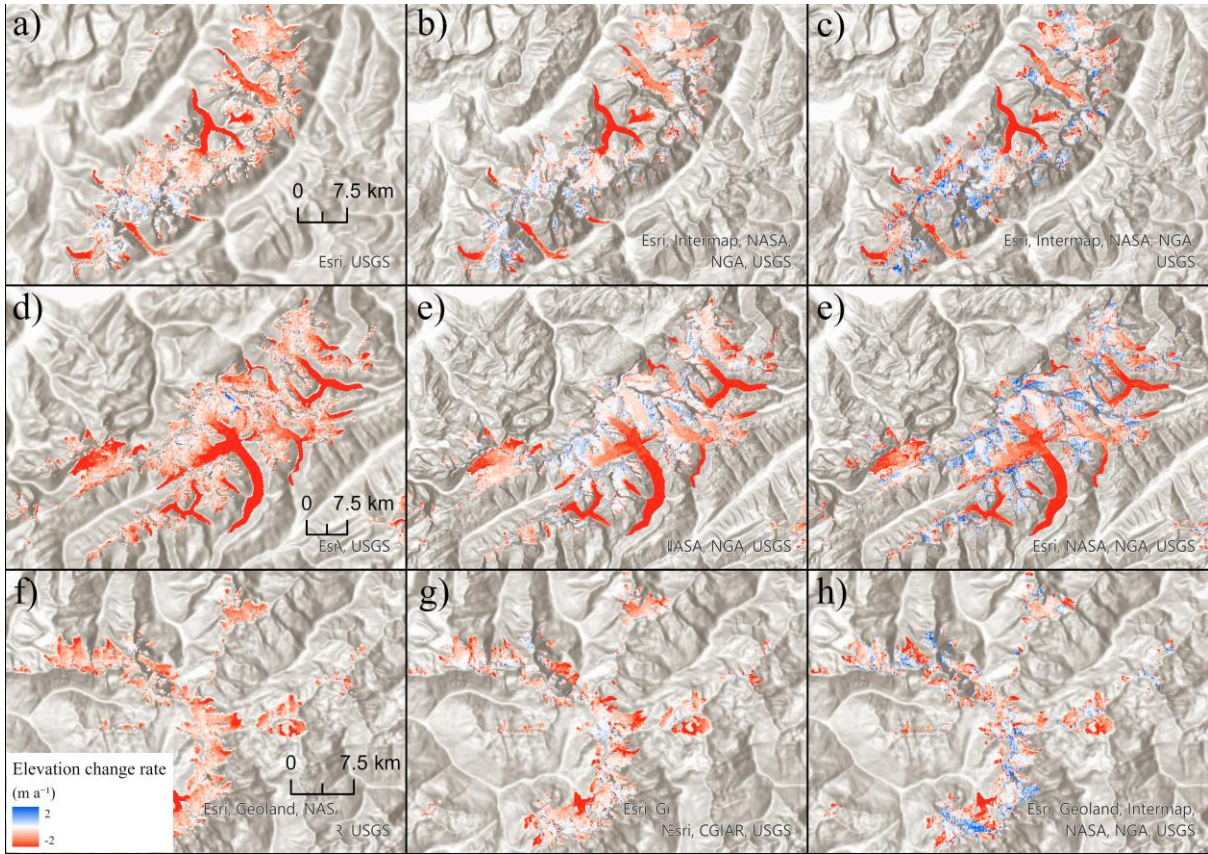

55

56 **Figure S6: Elevation change rate (m) for P2 a), d), f) from Hugonnet et al. (2021), b), e), g) from Sommer et al. (2020)**  
 57 **and c), e), h) from the difference of the SRTM DEM and the COP DEM. The mountain ranges are a-c) Mt. Blanc, d-e)**  
 58 **Bernese Alps, f-h) Ortles range. All background images: ESRI, (2023a).**

59

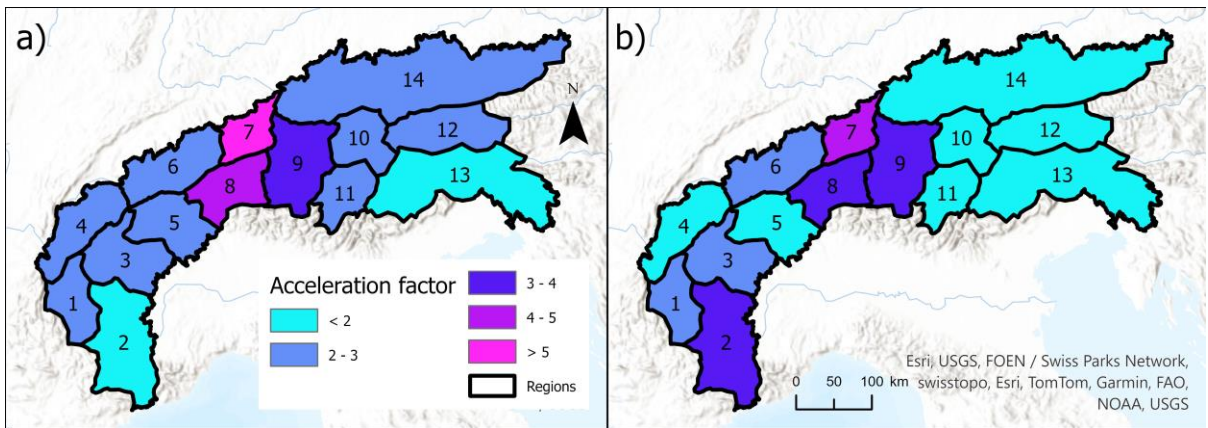

60

61 **Figure S7: Acceleration factor from comparing elevation change rates of a) LIA to SRTM to Sommer et al. (2020) and**  
 62 **b) LIA to SRTM compared to the SRTM to COP DEM period. All background images: ESRI, (2023a).**

63



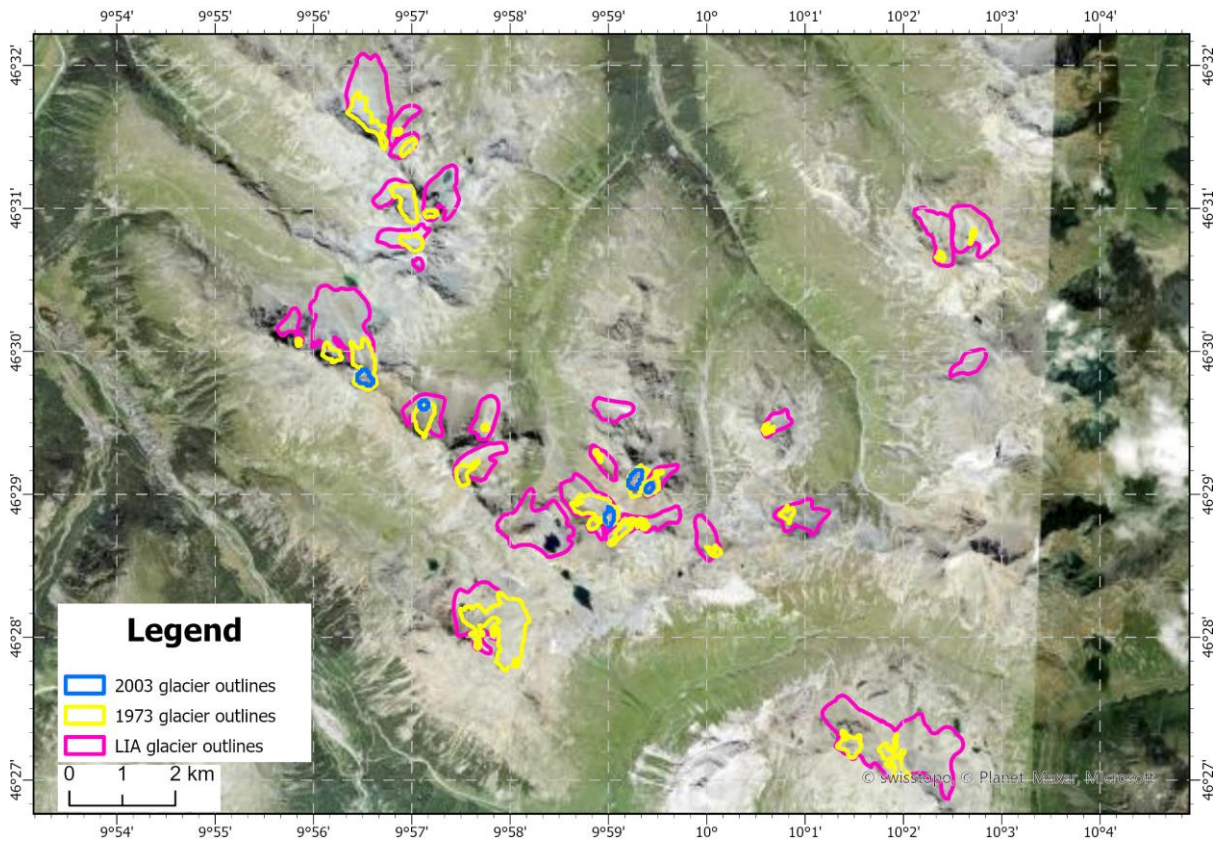

64

65 **Figure S8: Examples of an already glacier-free (no glaciers in 2015) basin (Val Chamuera in Engadin, Switzerland).**  
 66 **Background: ESRI, (2023b).**

67

68

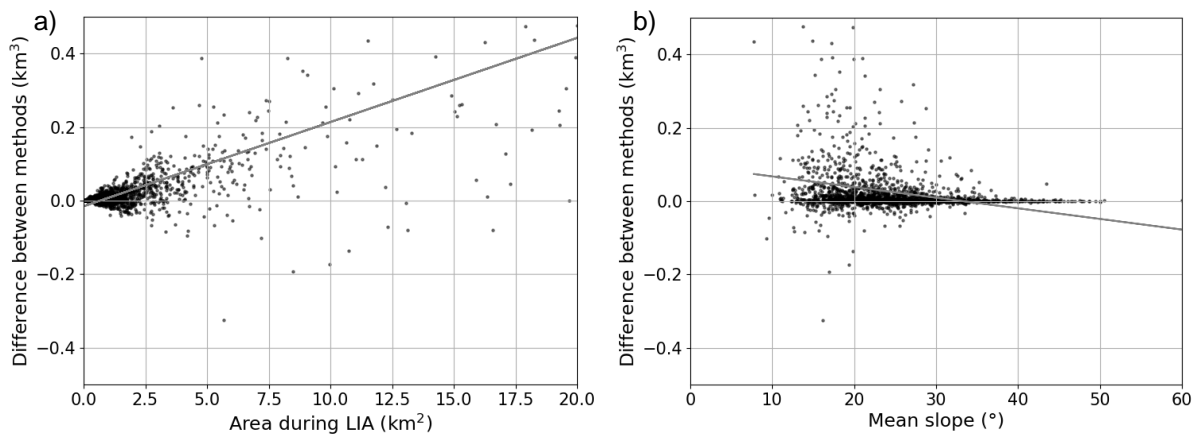

69

70 **Figure S9: a) Difference in volume change ( $\text{km}^3$ ) per glacier between the two methods (GIS-based and parameterisation**  
 71 **scheme) against the initial area. b) The difference between the methods against the mean slope. Positive values indicate**  
 72 **the calculated volume change in the GIS approach being larger.**

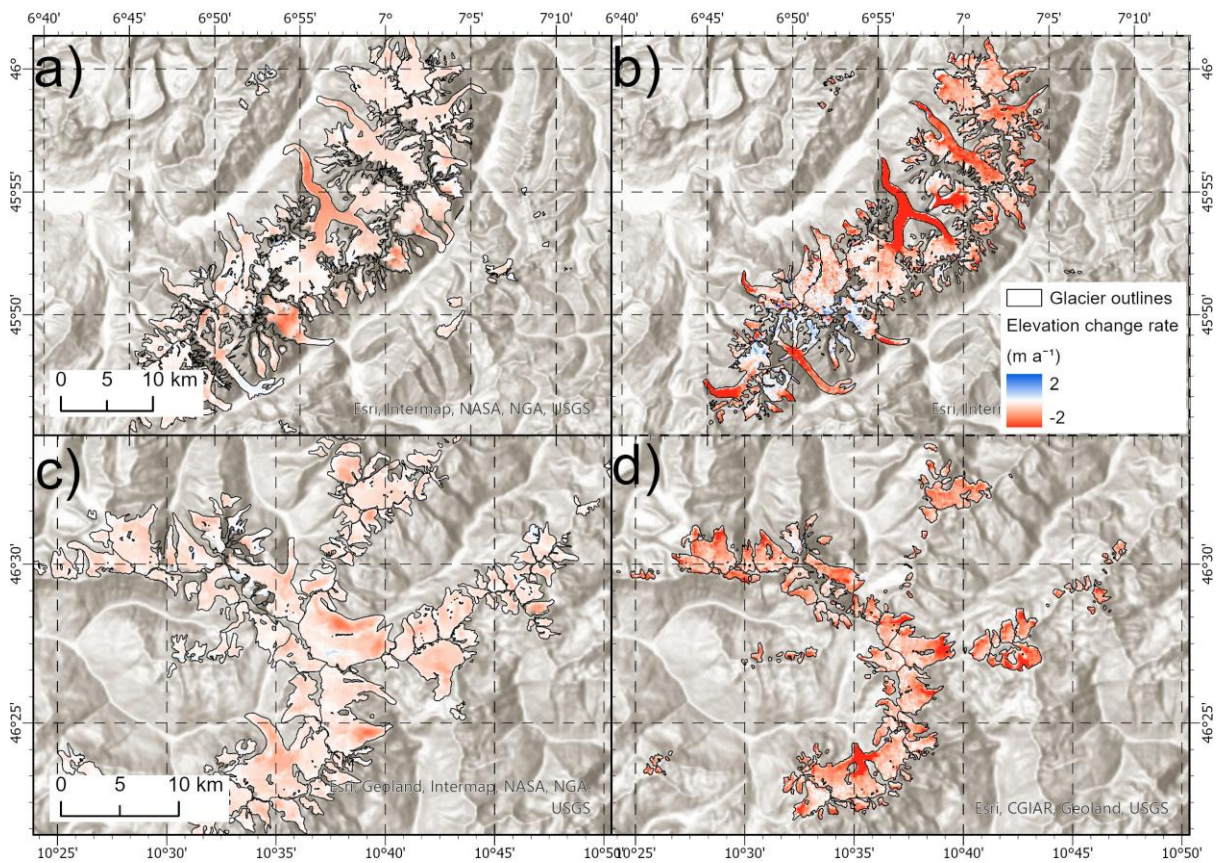

73

74 **Figure S10: Examples of elevation change rates between the LIA and 2000 (P1) (a & c) and 2000-2014 (P2) after**  
 75 **Hugonnet et al. (2021) (b & d) for the Mt. Blanc region (a & b) and the Ortles-Cevedale group (c & d) using**  
 76 **the same colour legend for all panels. All background images: ESRI, (2023a).**

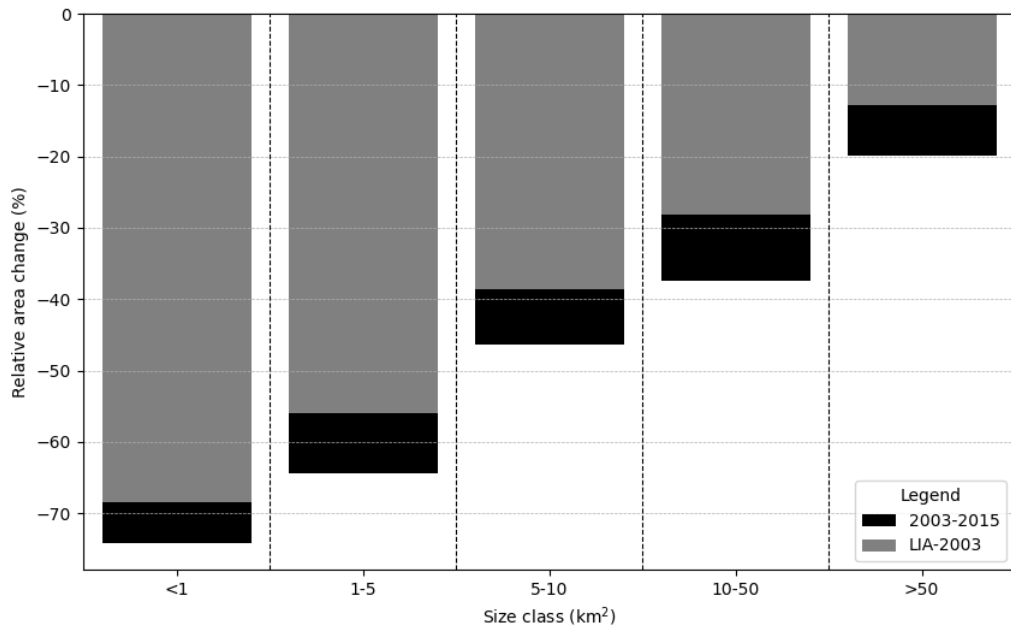

77

78 **Figure S11: Relative glacier area changes per size class since the LIA.**

79

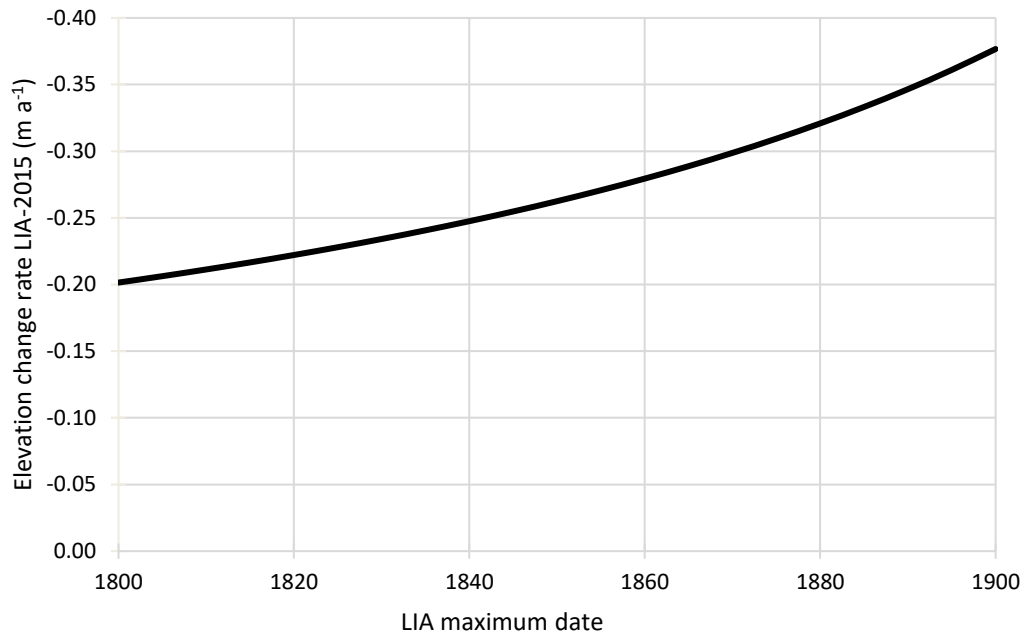

80

81 **Figure S12: Effect of LIA starting date on elevation and volume change rates.**

82

83

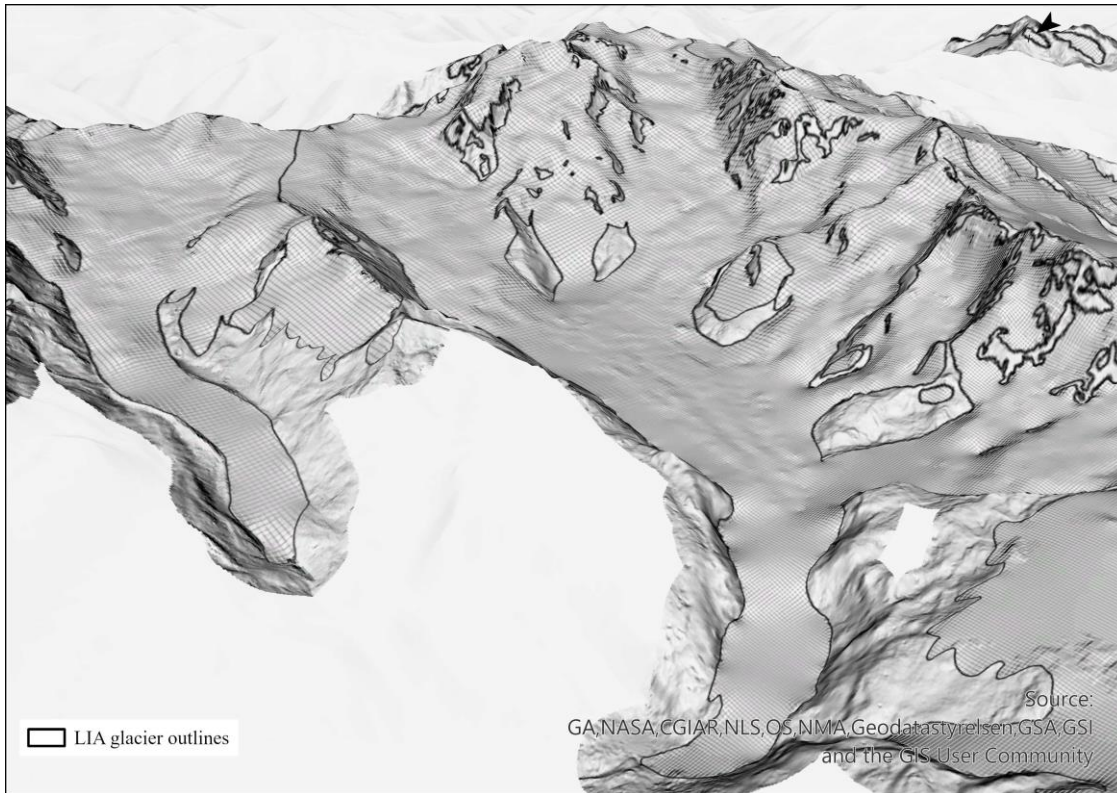

84

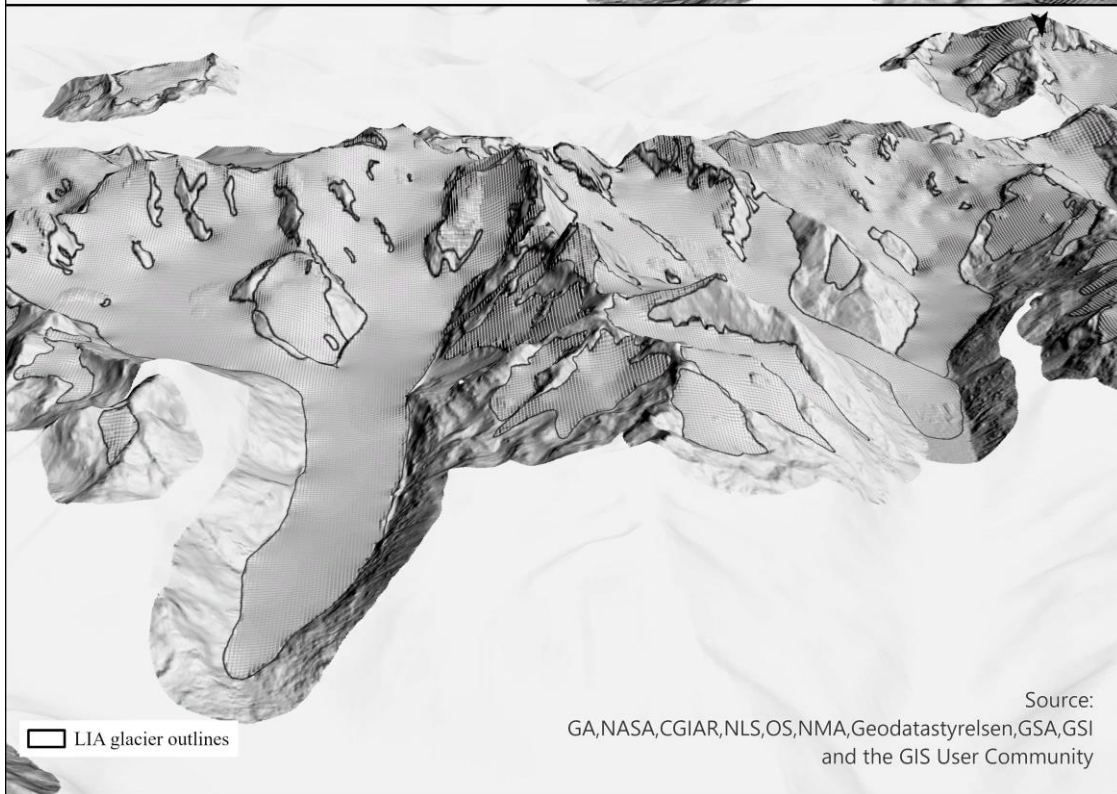

85

86

**Figure S13: Hillshade of Monte Rosa and Bernina at the end of the LIA.**

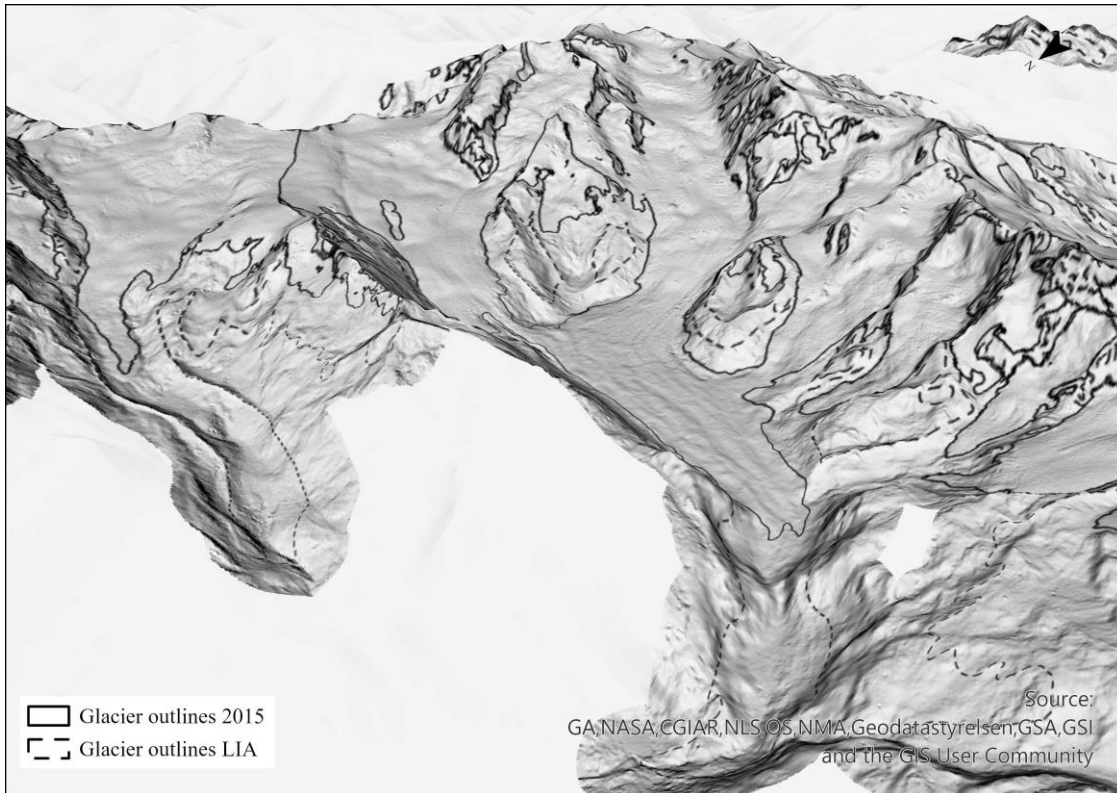

87

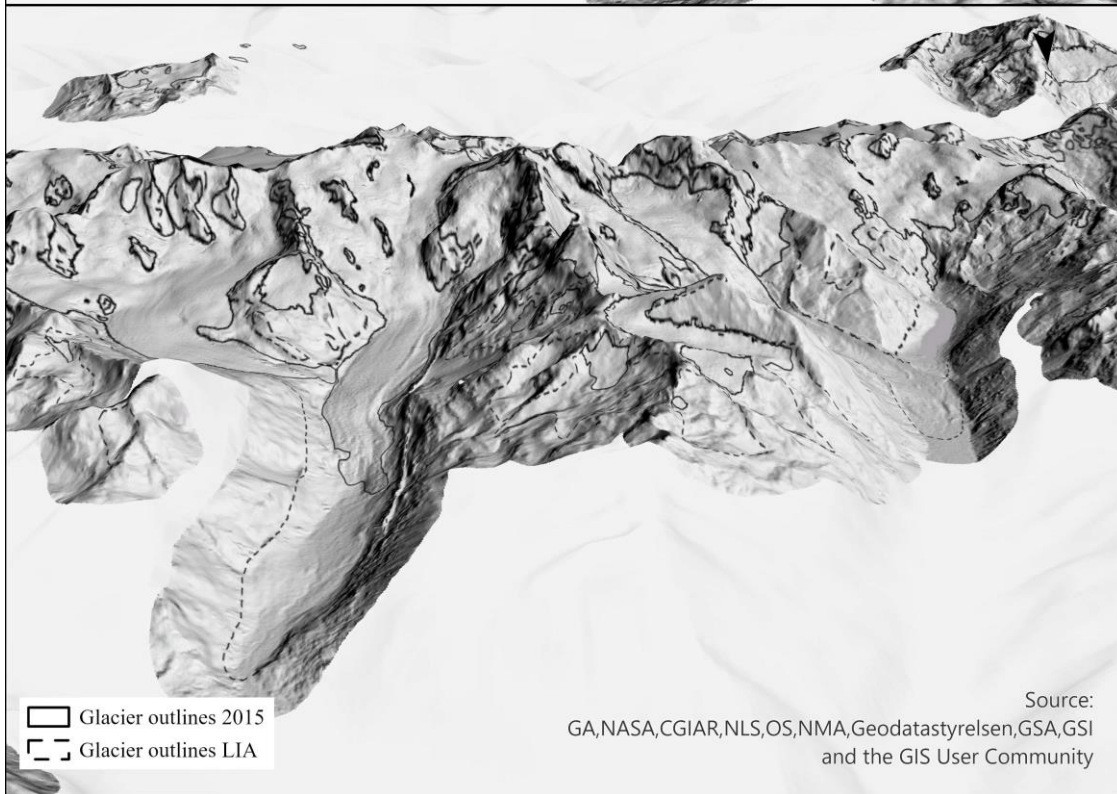

88

89 **Figure S14: Hillshade of Monte Rosa and Bernina in 2015.**

90

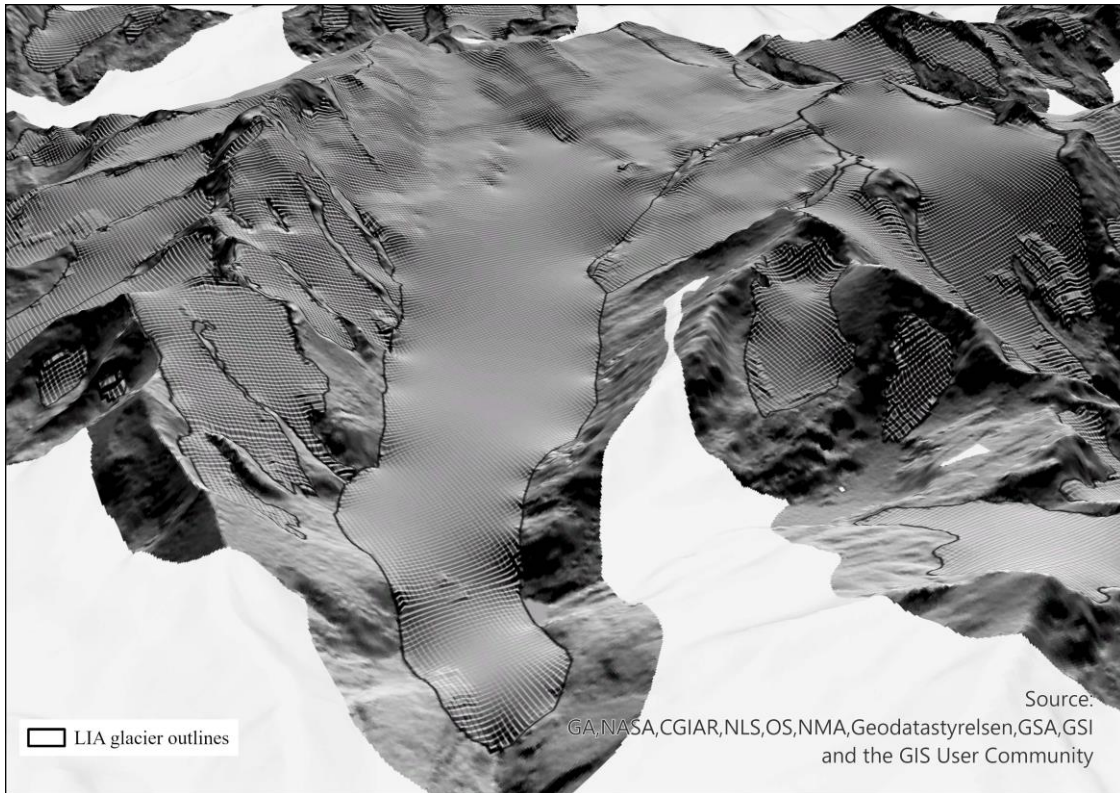

91

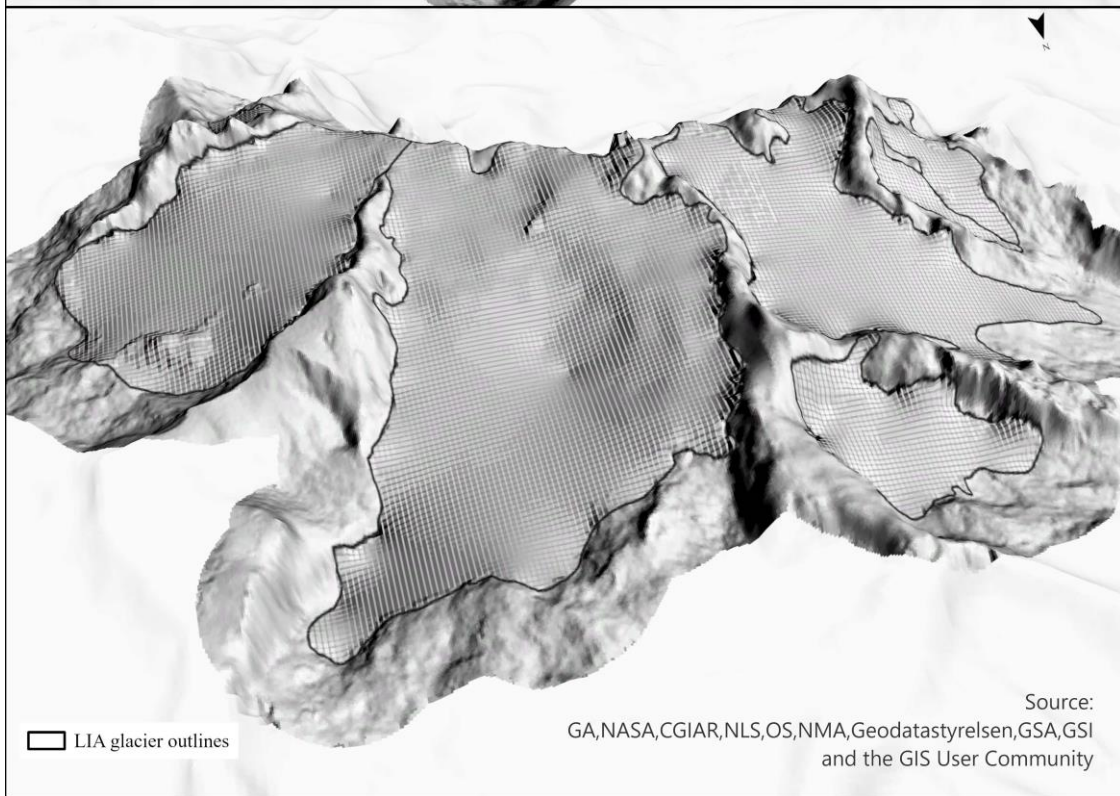

92

93

**Figure S15: Hillshade of Pasterze and Dachstein at the end of the LIA.**

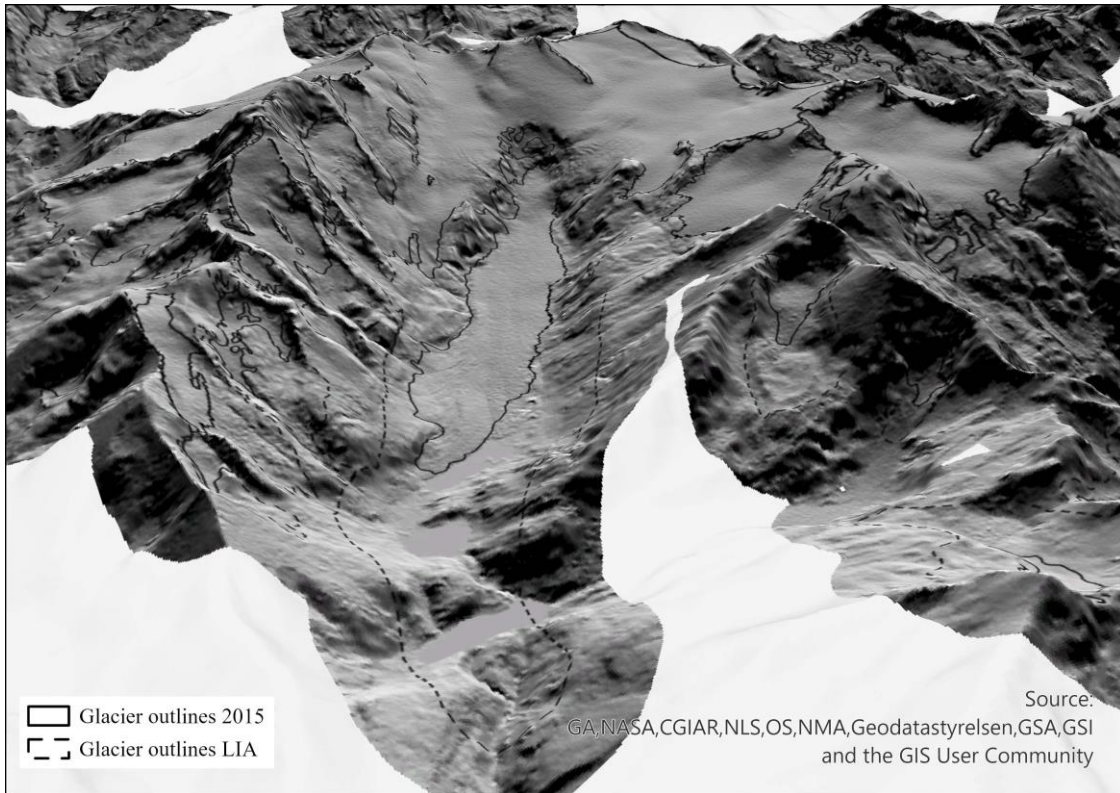

94

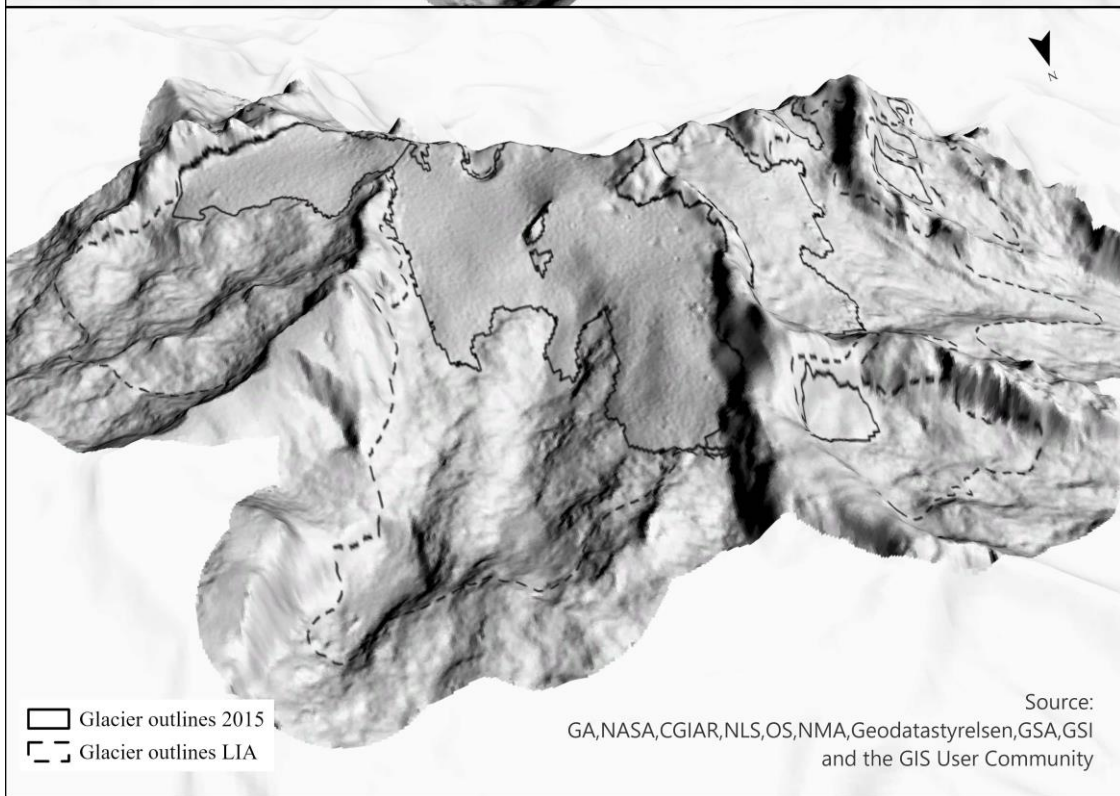

95

96

**Figure S16: Hillshade of Pasterze and Dachstein in 2015.**

97

98

99

100 **3 Uncertainty calculation**

101 The mapping uncertainty was taken from Reinthaler and Paul (2023) with a range of 10.1% or  $\pm 5.05\%$  around the  
 102 mean. This value was calculated from two multiple digitising experiments regarding interpretation and  
 103 reproduction uncertainty. This would give a total volume of  $281 \pm 14.2 \text{ km}^3$ .

104  
 105 The values regarding the uncertainty of the surface reconstruction were taken from Reinthaler and Paul (subm.)  
 106 as the mean difference (m) between the reconstructed LIA surface of the Bernese Alps and the reference DEM  
 107 (Dufour Atlas). A change of the mean glacier thickness by 4.6 m would lead to a change in the total volume of  
 108 6.9% ( $281 \pm 19.4 \text{ km}^3$ ).

109  
 110 The uncertainty values relating to the ice thickness (bedrock) data were taken directly from the studies publishing  
 111 the datasets and applied to the LIA dataset. For glaciers from the study by Helfricht et al. (2019), the uncertainty  
 112 value of 5% on the total volume taken and for the study by Grab et al. (2021), 4.1%. For the remaining glaciers,  
 113 the uncertainty was according to Millan et al. (2022) conservatively estimated to be 30% of the total volume. The  
 114 resulting volume uncertainty for the entire area is 12.7% with a total volume of  $281 \pm 35 \text{ km}^3$  (Table S6).  
 115

116 **Table S6: Uncertainty calculation of the impact of the ice thickness dataset on the total volume.**

| Country | LIA volume        |                          | Uncertainty value (%) | Lower bound LIA volume ( $\text{km}^3$ ) | Upper bound LIA volume ( $\text{km}^3$ ) |
|---------|-------------------|--------------------------|-----------------------|------------------------------------------|------------------------------------------|
|         | ( $\text{km}^3$ ) | Ice thickness dataset    |                       |                                          |                                          |
| FR      | 33.64             | (Millan et al., 2022)    | 30                    | 23.55                                    | 43.73                                    |
| CH      | 133.51            | (Grab et al., 2021)      | 4.1                   | 128.04                                   | 138.99                                   |
| IT      | 57.65             | (Millan et al., 2022)    | 30                    | 40.35                                    | 74.94                                    |
| AT      | 56.00             | (Helfricht et al., 2019) | 5                     | 53.20                                    | 58.80                                    |
| DE      | 0.13              | (Millan et al., 2022)    | 30                    | 0.09                                     | 0.17                                     |
| SI      | 0.02              |                          | 30                    | 0.01                                     | 0.02                                     |
| Total   | 281.0             |                          | 12.7                  | 245.3                                    | 361.6                                    |

117  
 118 The total random error ( $\varepsilon$ ) composed of mapping, surface reconstruction and bedrock uncertainty, was calculated  
 119 as  $\varepsilon = \sqrt{(5.05^2 + 6.9^2 + 12.7^2)}$  and results in 15.3% and a total volume of  $281 \pm 43 \text{ km}^3$ .  
 120

121 On top of the upper bound of  $324 \text{ km}^3$ , an underestimation of  $0.24 \text{ km}^3$  occurs from glaciers without LIA  
 122 equivalent. The total area in the RGI v7.0 is  $12.1 \text{ km}^2$  and with a relative change of 68.4% for glaciers smaller  
 123 than  $1 \text{ km}^2$  this leads to a total LIA area of  $38.37 \text{ km}^2$ . The LIA volume was calculated by using the 2015 mean  
 124 glacier thickness ( $h_F$ , calculated from the parameterisation scheme) and the LIA area. Glaciers completely melted  
 125 away are according to Parkes and Marzeion (2018) responsible for 4.4 mm (lower bound) of sea level rise  
 126 compared to a total of 89.1 mm between 1901 and 2015. This is a 4.9% difference and would add an additional  
 127  $13.9 \text{ km}^3$  and together with the  $0.24 \text{ km}^3$  gives a potential underestimation of  $14.1 \text{ km}^3$ . Taking all factors into  
 128 account, the upper limit for the total volume would be  $338 \text{ km}^3$ .  
 129



130 **4 Parameter calculations:**

- 131 1. Calculate length  $[LO]$  of each glacier  $L_0$  taken from centrelines using OGGM script. Length of the  
132 ablation area  $[La]= L_0/2$ .
- 133 2. Calculate min and max elevation for each glacier.
- 134 3. Elevation range  $dH = H_{max} - H_{min}$ .
- 135 4. Calculate average slope  $a = \arctan\left[\frac{dH}{L_0}\right]$ .
- 136 5. Mean basal shear stress:  $\tau_f = 0.005 + 1.598 * dH - 0.435 * dH$ .
- 137 6. Average ice depth along the flowline  $h_f = \frac{\tau_f}{f\rho g \sin \alpha}$  where the shape factor  $f = 0.8$ ;  $g$  is the gravitational  
138 acceleration  $9.81 \text{ m s}^{-2}$ ; and  $\rho$  = the ice density ( $900 \text{ kg m}^{-3}$ ).
- 139 7. Average thickness for a semi-elliptical profile:  $h_F = \left(\frac{\pi}{4}\right)h_f$ .
- 140 8. Volume  $V = A * h_F$ ;  $A$  being the glacier area.
- 141 9. Temperature changes from ELA changes:  $\delta T = \frac{\delta ELA}{lr}$   $lr$  being the lapse rate.

142

143

144 **5 Additional references**

- 145 Colucci, R. R. and Žebre, M.: Late Holocene evolution of glaciers in the southeastern Alps, *J Maps*, 12, 289–299,  
146 <https://doi.org/10.1080/17445647.2016.1203216>, 2016.
- 147 ESRI: “Topographic” [basemap]. scale not given. “World Topographic Map,” 2023a.
- 148 ESRI: “World Imagery” [basemap]. scale not given. “World Imagery,” 2023b.
- 149 Fischer, A., Seiser, B., Stocker Waldhuber, M., Mitterer, C., and Abermann, J.: Tracing glacier changes in Austria  
150 from the Little Ice Age to the present using a lidar-based high-resolution glacier inventory in Austria,  
151 *Cryosphere*, 9, 753–766, <https://doi.org/10.5194/tc-9-753-2015>, 2015.
- 152 Gardent, M. and Deline, P.: Stages of glacial retreat in the French Alps since the termination of the Little Ice Age,  
153 <https://doi.org/10.1016/j.quaint.2012.08.184>, 2011.
- 154 Grab, M., Mattea, E., Bauder, A., Huss, M., Rabenstein, L., Hodel, E., Linsbauer, A., Langhammer, L., Schmid,  
155 L., Church, G., Hellmann, S., Deleze, K., Schaer, P., Lathion, P., Farinotti, D., and Maurer, H.: Ice thickness  
156 distribution of all Swiss glaciers based on extended ground-penetrating radar data and glaciological modeling,  
157 *Journal of Glaciology*, 67, 1074–1092, <https://doi.org/10.1017/jog.2021.55>, 2021.
- 158 Groß, G.: Der Flächenverlust der Gletscher in Österreich 1850 – 1920 – 1969, *Zeitschrift für Gletscherkunde und*  
159 *Glazialgeologie*, 23, 131–141, 1987.
- 160 Helfricht, K., Huss, M., Fischer, A., and Otto, J. C.: Calibrated ice thickness estimate for all glaciers in Austria,  
161 *Front Earth Sci (Lausanne)*, 7, 1–15, <https://doi.org/10.3389/feart.2019.00068>, 2019.
- 162 Hugonnet, R., McNabb, R., Berthier, E., Menounos, B., Nuth, C., Girod, L., Farinotti, D., Huss, M., Dussaillant,  
163 I., Brun, F., and Kääb, A.: Accelerated global glacier mass loss in the early twenty-first century, *Nature*, 592,  
164 726–731, <https://doi.org/10.1038/s41586-021-03436-z>, 2021.
- 165 Knoll, C., Kerschner, H., Heller, A., and Rastner, P.: A GIS-based reconstruction of little ice age glacier maximum  
166 extents for South Tyrol, Italy, *Transactions in GIS*, 13, 449–463, [https://doi.org/10.1111/j.1467-](https://doi.org/10.1111/j.1467-9671.2009.01173.x)  
167 [9671.2009.01173.x](https://doi.org/10.1111/j.1467-9671.2009.01173.x), 2009.
- 168 Lucchesi, S., Fioraso, G., Bertotto, S., and Chiarle, M.: Little Ice Age and contemporary glacier extent in the  
169 Western and South-Western Piedmont Alps (North-Western Italy), *J Maps*, 10, 409–423,  
170 <https://doi.org/10.1080/17445647.2014.880226>, 2014.
- 171 Maisch, M., Wipf, A., Denneler, B., Battaglia, J., and Benz, C.: Die Gletscher der Schweizer Alpen:  
172 Gletscherhochstand 1850, aktuelle Vergletscherung, Gletscherschwundszenerarien, in: *Schlussbericht NFP 31*,  
173 second edition, Hochschulverlag ETH Zurich, Zurich, 373p, 2000.
- 174 Millan, R., Mougnot, J., Rabatel, A., and Morlighem, M.: Ice velocity and thickness of the world’s glaciers, *Nat*  
175 *Geosci*, 15, 124–129, <https://doi.org/10.1038/s41561-021-00885-z>, 2022.
- 176 Müller, F., Caflisch, T., and Müller, G.: *Firn und Eis der Schweizer Alpen: Gletscherinventar*, Geographisches  
177 Institut Publ. 57, Zurich, Eidgenössische Technische Hochschule, 1976.
- 178 Parkes, D. and Marzeion, B.: Twentieth-century contribution to sea-level rise from uncharted glaciers, *Nature*,  
179 563, 551–554, <https://doi.org/10.1038/s41586-018-0687-9>, 2018.
- 180 Paul, F., Rastner, P., Azzoni, R. S., Diolaiuti, G., Fugazza, D., Bris, R. Le, Nemeč, J., Rabatel, A., Ramusovic,  
181 M., Schwaizer, G., and Smiraglia, C.: Glacier shrinkage in the Alps continues unabated as revealed by a new

182 glacier inventory from Sentinel-2, *Earth Syst Sci Data*, 12, 1805–1821, <https://doi.org/10.5194/essd-12-1805->  
183 2020, 2020.

184 Pfeffer, W. T., Arendt, A. A., Bliss, A., Bolch, T., Cogley, J. G., Gardner, A. S., Hagen, J. O., Hock, R., Kaser,  
185 G., Kienholz, C., Miles, E. S., Moholdt, G., Mölg, N., Paul, F., Radić, V., Rastner, P., Raup, B. H., Rich, J.,  
186 Sharp, M. J., Andreassen, L. M., Bajracharya, S., Barrand, N. E., Beedle, M. J., Berthier, E., Bhambri, R.,  
187 Brown, I., Burgess, D. O., Burgess, E. W., Cawkwell, F., Chinn, T., Copland, L., Cullen, N. J., Davies, B., De  
188 Angelis, H., Fountain, A. G., Frey, H., Giffen, B. A., Glasser, N. F., Gurney, S. D., Hagg, W., Hall, D. K.,  
189 Haritashya, U. K., Hartmann, G., Herreid, S., Howat, I., Jiskoot, H., Khromova, T. E., Klein, A., Kohler, J.,  
190 König, M., Kriegel, D., Kutuzov, S., Lavrentiev, I., Le Bris, R., Li, X., Manley, W. F., Mayer, C., Menounos,  
191 B., Mercer, A., Mool, P., Negrete, A., Nosenko, G., Nuth, C., Osmonov, A., Pettersson, R., Racoviteanu, A.,  
192 Ranzi, R., Sarikaya, M. A., Schneider, C., Sigurdsson, O., Sirguey, P., Stokes, C. R., Wheate, R., Wolken, G.  
193 J., Wu, L. Z., and Wyatt, F. R.: The randolph glacier inventory: A globally complete inventory of glaciers,  
194 *Journal of Glaciology*, 60, 537–552, <https://doi.org/10.3189/2014JoG13J176>, 2014.

195 Reinthaler, J. and Paul, F.: Using a Web Map Service to map Little Ice Age glacier extents at regional scales, *Ann*  
196 *Glaciol*, 1–19, <https://doi.org/https://doi.org/10.1017/aog.2023.39>, 2023.

197 Reinthaler, J. and Paul, F.: Methods for reconstructing Little Ice Age glacier surfaces in Novaya Zemlya and the  
198 Swiss Alps: Uncertainties and volume changes, *Geomorphology*, <https://doi.org/10.2139/ssrn.4593636>, n.d.

199 RGI 7.0 Consortium: Randolph Glacier Inventory - A Dataset of Global Glacier Outlines, Version 7.0,  
200 <https://doi.org/10.5067/f6jmovy5navz>, 2023.

201 Sommer, C., Malz, P., Seehaus, T. C., Lippl, S., Zemp, M., and Braun, M. H.: Rapid glacier retreat and  
202 downwasting throughout the European Alps in the early 21st century, *Nat Commun*, 11,  
203 <https://doi.org/10.1038/s41467-020-16818-0>, 2020.

204 Vivian, R.: *Les glacier des Alpes occidentales*, Grenoble: Allier, 1975.

205 Zanoner, T., Carton, A., Seppi, R., Carturan, L., Baroni, C., Salvatore, M. C., and Zumiani, M.: Little Ice Age  
206 mapping as a tool for identifying hazard in the paraglacial environment: The case study of Trentino (Eastern  
207 Italian Alps), *Geomorphology*, 295, 551–562, <https://doi.org/10.1016/j.geomorph.2017.08.014>, 2017.

208
