# Supplementary material for: Reconstructed glacier area and volume changes in the European Alps since the Little Ice Age
Source: Copernicus journal article supplement (doi:10.5194/egusphere-2024-989), 2024-05-03
Supplement: Supplementary file [file egusphere-2024-989-CC1-supplement.pdf]

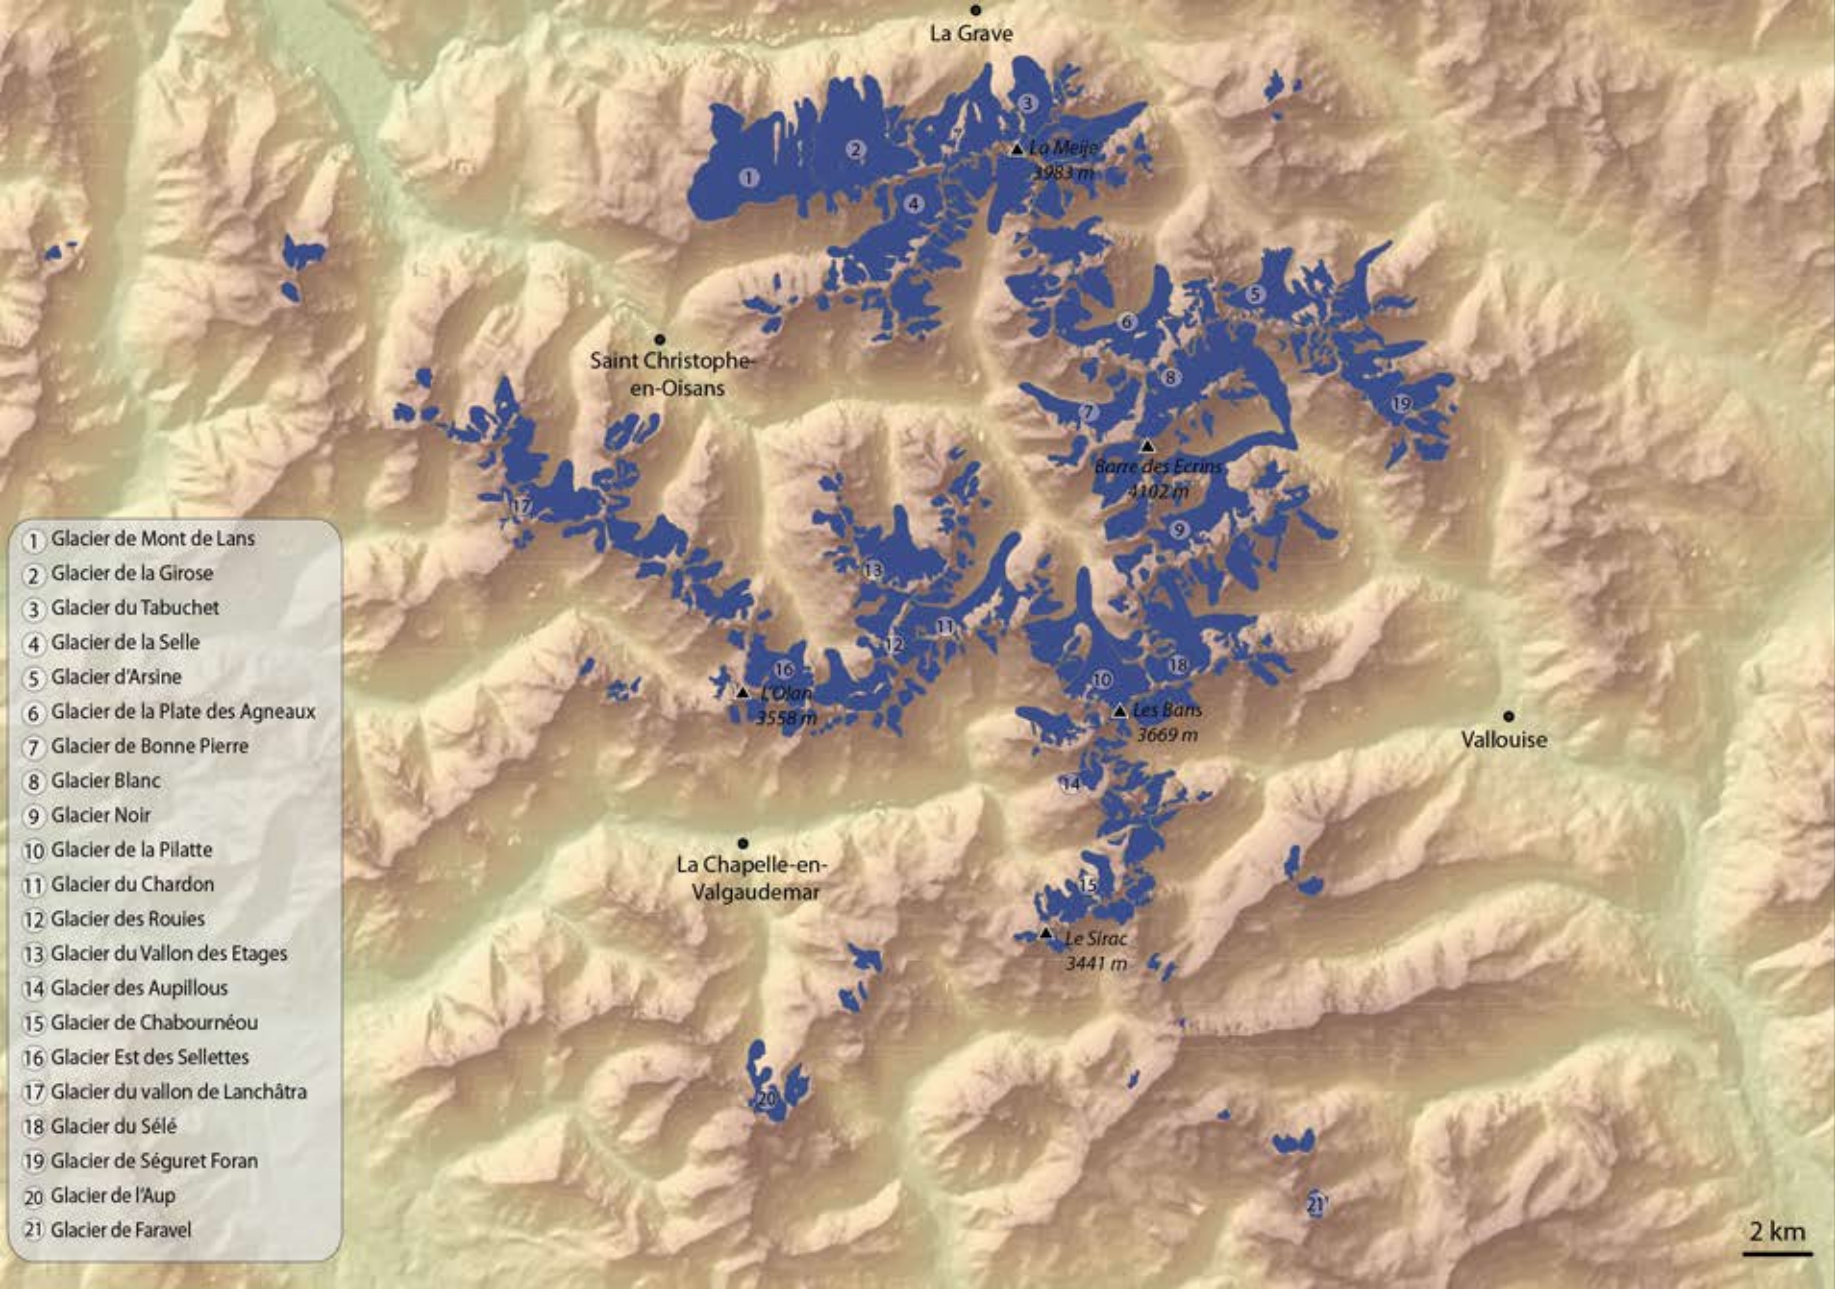

La Grave

Saint-Christophe-en-Oisans

Vallouise

La Chapelle-en-Valgaudemar

▲ La Meije  
3983 m

▲ Barre des Ecrins  
4102 m

▲ L'Olan  
3558 m

▲ Les Bans  
3669 m

▲ Le Sirac  
3441 m

- 1 Glacier de Mont de Lans
- 2 Glacier de la Girose
- 3 Glacier du Tabuchet
- 4 Glacier de la Selle
- 5 Glacier d'Arsine
- 6 Glacier de la Plate des Agneaux
- 7 Glacier de Bonne Pierre
- 8 Glacier Blanc
- 9 Glacier Noir
- 10 Glacier de la Pilatte
- 11 Glacier du Chardon
- 12 Glacier des Rouies
- 13 Glacier du Vallon des Etages
- 14 Glacier des Aupillous
- 15 Glacier de Chabournéou
- 16 Glacier Est des Sellettes
- 17 Glacier du vallon de Lanchâtra
- 18 Glacier du Sélé
- 19 Glacier de Séguret Foran
- 20 Glacier de l'Aup
- 21 Glacier de Faravel

2 km
